# Supplementary material for: Contextual and individual inequalities in breast cancer screening participation and outcomes in Turin (North-West Italy)
Source: PubMed Central journal article supplement (PMC11211318; doi:10.1038/s41523-024-00660-4), 2024-06-27

**Supplementary table 1 - Participation to breast cancer screening in Piedmont by type of screening**

| <b>Participation to <u>organized</u> breast cancer screening by socioeconomic characteristics - Piedmont 2020-2021</b> |                                | <b>%</b> | <b>95% CI</b> |       |
|------------------------------------------------------------------------------------------------------------------------|--------------------------------|----------|---------------|-------|
| <b>Age</b>                                                                                                             | 50-59                          | 51.5%    | 46.2%         | 57.4% |
|                                                                                                                        | 60-69                          | 54.5%    | 47.6%         | 61.3% |
| <b>Cohabitation</b>                                                                                                    | no                             | 56.3%    | 47.7%         | 64.4% |
|                                                                                                                        | yes                            | 51.5%    | 46.3%         | 56.6% |
| <b>Married</b>                                                                                                         | no                             | 58.0%    | 49.0%         | 66.4% |
|                                                                                                                        | yes                            | 51.0%    | 46.0%         | 56.1% |
| <b>Education</b>                                                                                                       | no education/elementary school | 48.8%    | 29.5%         | 68.4% |
|                                                                                                                        | middle school                  | 57.9%    | 49.7%         | 65.6% |
|                                                                                                                        | high school                    | 52.1%    | 45.7%         | 58.4% |
|                                                                                                                        | university degree              | 45.4%    | 33.5%         | 57.9% |
| <b>Economic difficulties</b>                                                                                           | many                           | 42.8%    | 25.8%         | 61.6% |
|                                                                                                                        | some                           | 52.2%    | 43.2%         | 61.1% |
|                                                                                                                        | no difficulties                | 54.7%    | 49.5%         | 59.8% |
| <b>Nationality</b>                                                                                                     | Italian                        | 53.6%    | 49.2%         | 58.0% |
|                                                                                                                        | foreigner                      | 49.0%    | 30.7%         | 67.5% |

| <b>Participation to <u>opportunistic</u> breast cancer screening by socioeconomic characteristics - Piedmont 2020-2021</b> |                                | <b>%</b> | <b>95% CI</b> |       |
|----------------------------------------------------------------------------------------------------------------------------|--------------------------------|----------|---------------|-------|
| <b>Age</b>                                                                                                                 | 50-59                          | 20.6%    | 16.2%         | 25.8% |
|                                                                                                                            | 60-69                          | 10.7%    | 7.1%          | 15.8% |
| <b>Cohabitation</b>                                                                                                        | no                             | 9.8%     | 5.9%          | 16.1% |
|                                                                                                                            | yes                            | 19.2%    | 15.4%         | 23.6% |
| <b>Married</b>                                                                                                             | no                             | 8.5%     | 4.9%          | 14.2% |
|                                                                                                                            | yes                            | 19.2%    | 15.5%         | 23.6% |
| <b>Education</b>                                                                                                           | no education/elementary school | 3.6%     | 0.5%          | 21.7% |
|                                                                                                                            | middle school                  | 6.9%     | 4.1%          | 11.3% |
|                                                                                                                            | high school                    | 19.5%    | 14.9%         | 25.1% |
|                                                                                                                            | university degree              | 30.6%    | 20.6%         | 42.9% |
| <b>Economic difficulties</b>                                                                                               | many                           | 20.5%    | 9.3%          | 39.4% |
|                                                                                                                            | some                           | 5.5%     | 2.7%          | 11.1% |
|                                                                                                                            | no difficulties                | 20.1%    | 16.2%         | 24.8% |
| <b>Nationality</b>                                                                                                         | Italian                        | 17.5%    | 14.2%         | 21.3% |
|                                                                                                                            | foreigner                      | 1.9%     | 0.3%          | 12.6% |

| <b>Total participation to breast cancer screening (either organized or opportunistic) by socioeconomic characteristics - Piedmont 2020-2021</b> |                                | <b>%</b> | <b>95% CI</b> |       |
|-------------------------------------------------------------------------------------------------------------------------------------------------|--------------------------------|----------|---------------|-------|
| <b>Age</b>                                                                                                                                      | 50-59                          | 72.6%    | 67.0%         | 77.5% |
|                                                                                                                                                 | 60-69                          | 65.7%    | 58.8%         | 71.9% |
| <b>Cohabitation</b>                                                                                                                             | no                             | 66.8%    | 58.6%         | 74.1% |
|                                                                                                                                                 | yes                            | 70.7%    | 65.4%         | 75.5% |
| <b>Married</b>                                                                                                                                  | no                             | 67.2%    | 58.5%         | 74.8% |
|                                                                                                                                                 | yes                            | 70.4%    | 65.4%         | 74.9% |
| <b>Education</b>                                                                                                                                | no education/elementary school | 52.3%    | 32.2%         | 71.8% |
|                                                                                                                                                 | middle school                  | 64.8%    | 57.0%         | 71.8% |
|                                                                                                                                                 | high school                    | 71.7%    | 65.3%         | 77.3% |
|                                                                                                                                                 | university degree              | 77.1%    | 65.7%         | 85.5% |
| <b>Economic difficulties</b>                                                                                                                    | many                           | 63.3%    | 44.4%         | 78.8% |
|                                                                                                                                                 | some                           | 58.0%    | 49.1%         | 66.5% |
|                                                                                                                                                 | no difficulties                | 75.1%    | 70.4%         | 79.3% |
| <b>Nationality</b>                                                                                                                              | Italian                        | 71.4%    | 67.0%         | 75.4% |
|                                                                                                                                                 | foreigner                      | 50.9%    | 32.4%         | 69.1% |

Supplementary Figure 1 - Flow chart of the data selection procedure

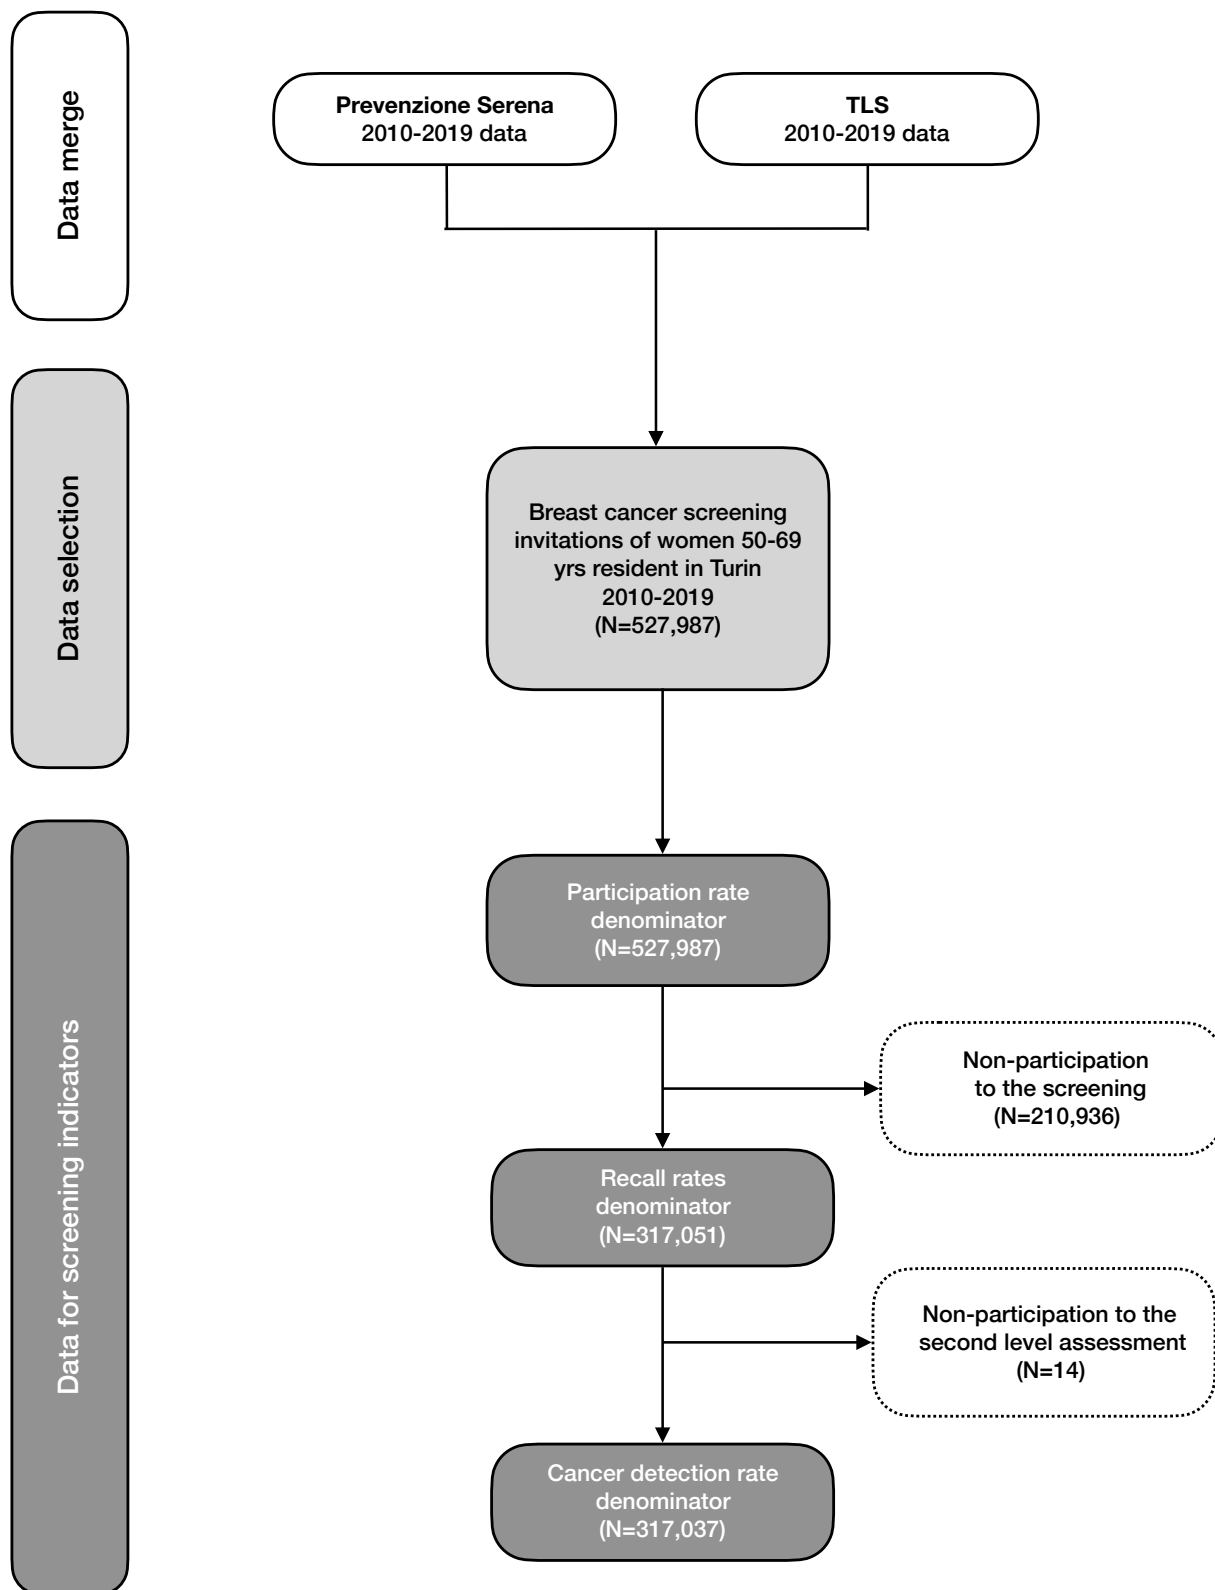

Supplement: 41523_2024_660_MOESM1_ESM.pdf [file 41523_2024_660_MOESM1_ESM.pdf]
